# Supplementary material
Source: PubMed Central journal article supplement (PMC5478438)
Supplement: NIHMS852358-supplement-1.pdf [file NIHMS852358-supplement-1.pdf]

## SUPPLEMENTARY INFORMATION

### Lipid II overproduction allows direct assay of transpeptidase inhibition by $\beta$ -lactams

Yuan Qiao,<sup>1,2†</sup> Veerasak Srisuknimit,<sup>2†</sup> Frederick Rubino,<sup>2</sup> Kaitlin Schaefer,<sup>1,2</sup> Natividad Ruiz,<sup>3</sup> Suzanne Walker,<sup>1\*</sup> and Daniel Kahne<sup>2\*</sup>

<sup>1</sup> Department of Microbiology and Immunology, Harvard Medical School, Boston Massachusetts, 02115, United States

<sup>2</sup> Department of Chemistry and Chemical Biology, Harvard University, Cambridge Massachusetts, 02138, United States

<sup>3</sup> Department of Microbiology, Ohio State University, Columbus, OH 43210

\*Correspondence to: [suzanne\\_walker@hms.harvard.edu](mailto:suzanne_walker@hms.harvard.edu); [kahne@chemistry.harvard.edu](mailto:kahne@chemistry.harvard.edu)

† These authors contributed to the work equally.

## SUPPLEMENTARY RESULTS

a) *S. aureus* growth curve

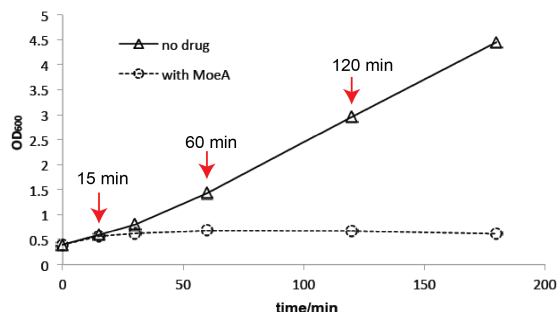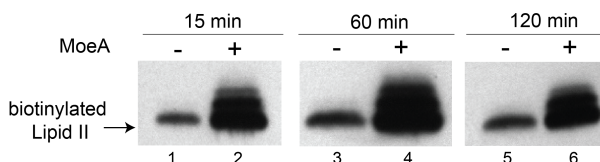

b) *B. subtilis* growth curve

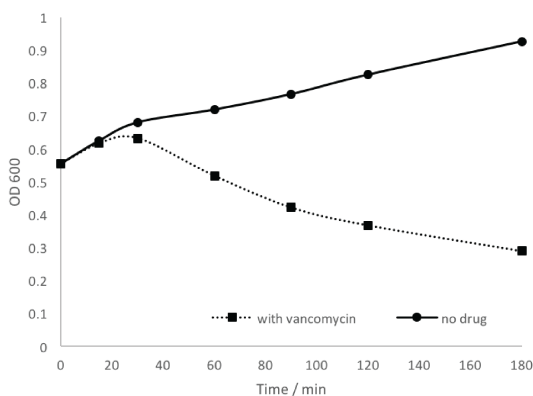

c) *E. coli* growth curve

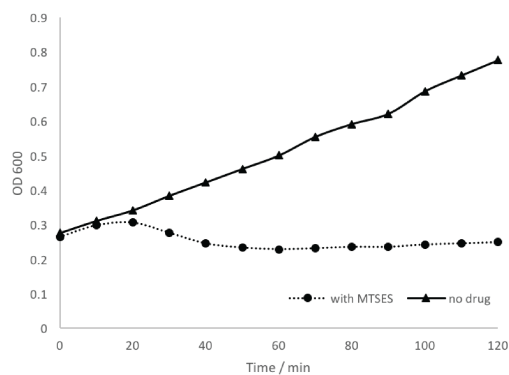

d) *S. aureus* samples

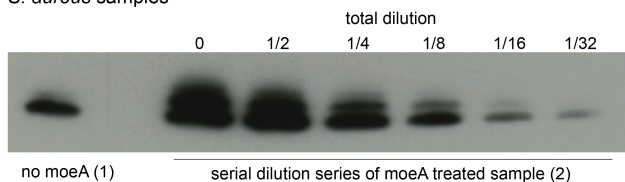

e) *B. subtilis* samples

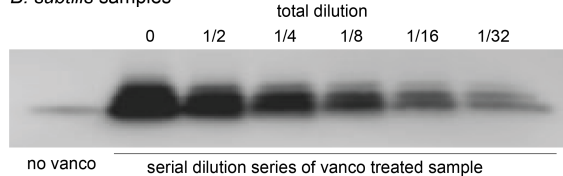

f) *E. coli* samples

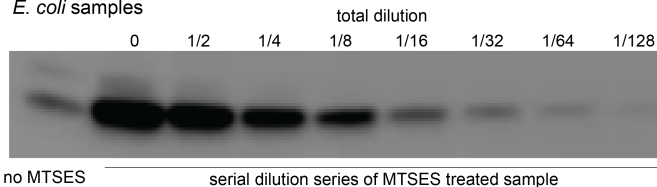

**Supplementary Figure 1. Lipid II is substantially accumulated in bacteria treated with various chemical probes.** (a) Treatment of moenomicin (0.6  $\mu\text{g}/\text{mL}$ ) to *S. aureus* stalls growth, while Lipid II accumulation in *S. aureus* is stable after prolonged moenomicin treatment. (b-c) Treatment of vancomycin (8  $\mu\text{g}/\text{mL}$ ) to *B. subtilis* and of MTSES to *E. coli* MurJ<sup>A29C</sup> causes rapid cell lysis. (d-f) Serial dilutions of samples enable estimation that Lipid II is accumulated 10-fold, 30-fold, and 16-fold in *S. aureus*, *B. subtilis* and *E. coli* respectively when treated with the indicated chemical probes. Detection of cellular Lipid II follows a previously published protocol.<sup>1</sup>

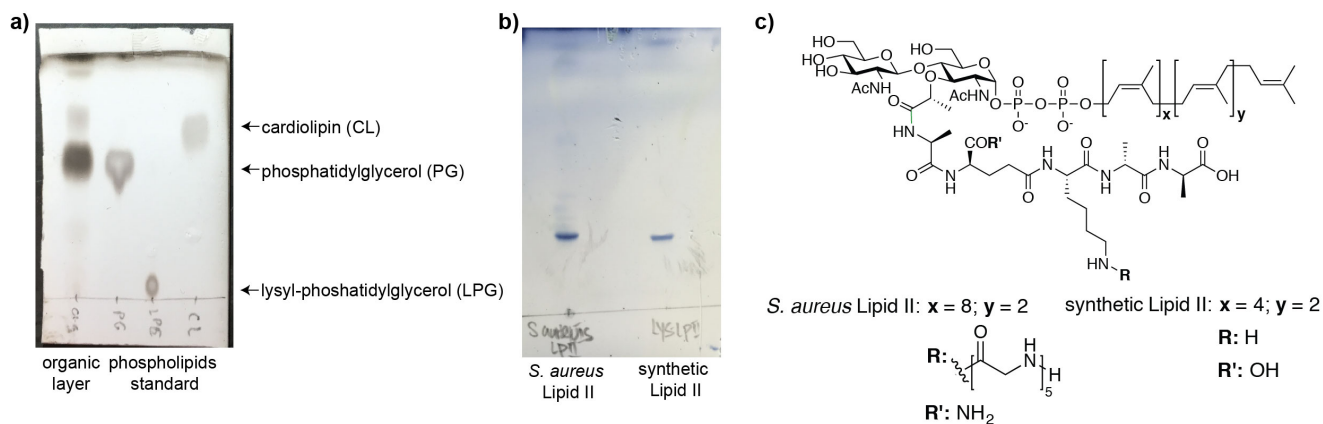

**Supplementary Figure 2. Thin layer chromatography (TLC) analysis shows that the isolated Lipid II has good purity.** Cellular phospholipids partition into the organic layer after the first (MeOH/CHCl<sub>3</sub>) extraction (a); *S. aureus* Lipid II was obtained in the organic phase after the second (PyAc/BuOH) extraction (b). See materials and methods for TLC protocols.

a) LC/MS/MS fragmentation pattern for *S. aureus* sample

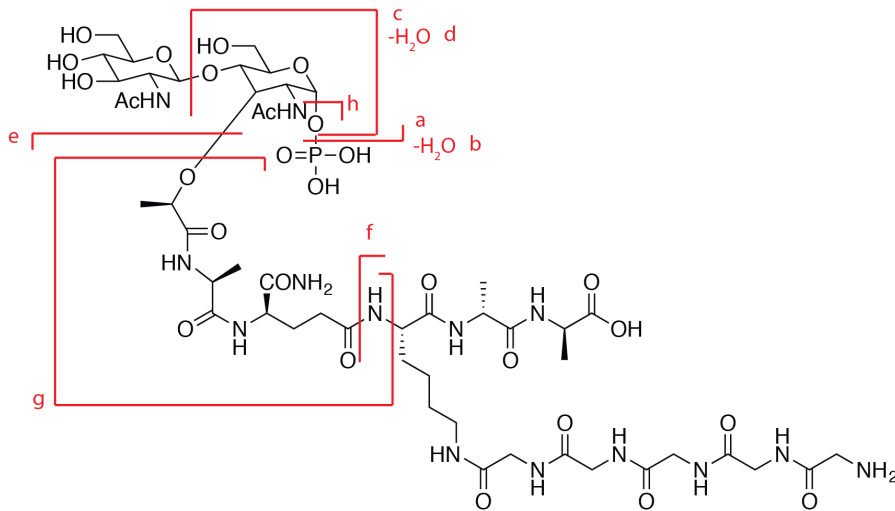

b) LC/MS/MS for *S. aureus* sample

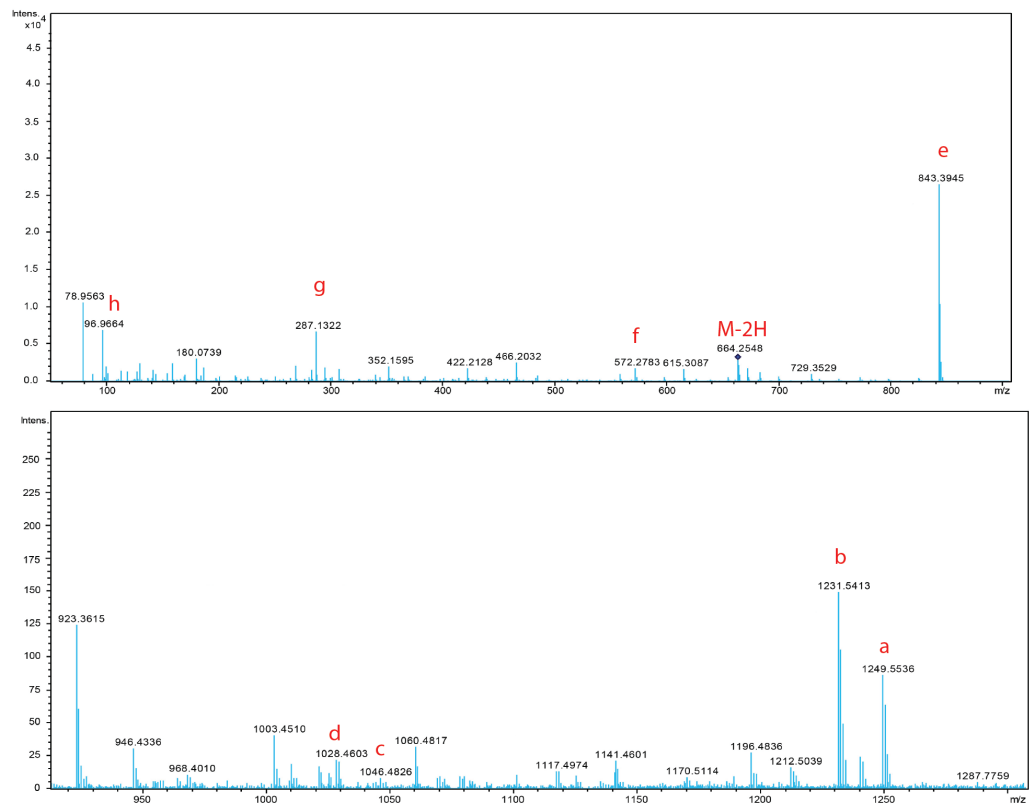

c) i. LC/MS EIC for *B. subtilis* sample

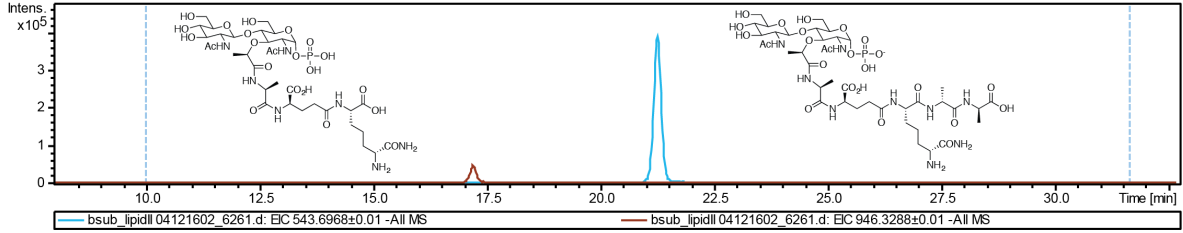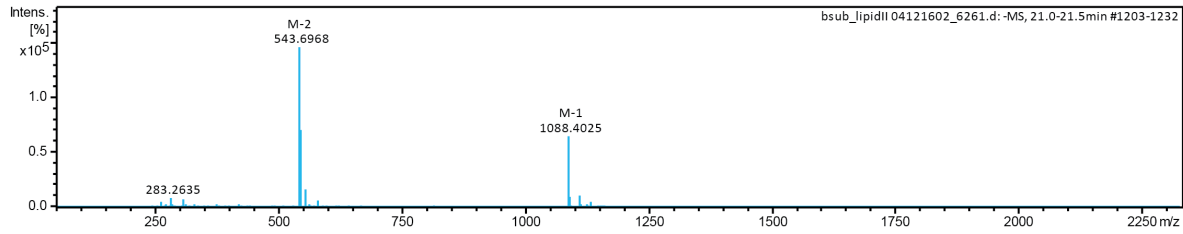

ii. LC/MS EIC for *E. coli* sample

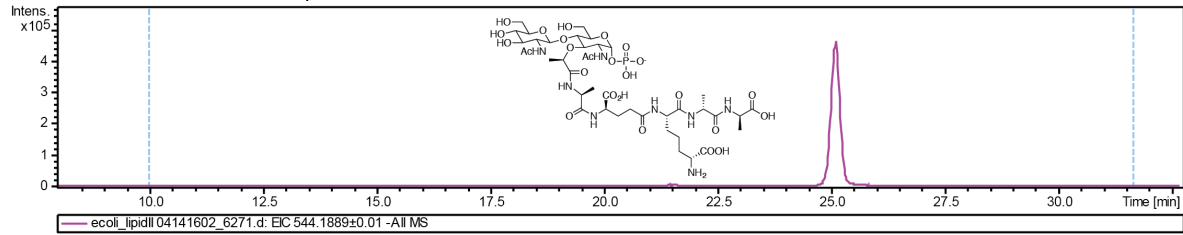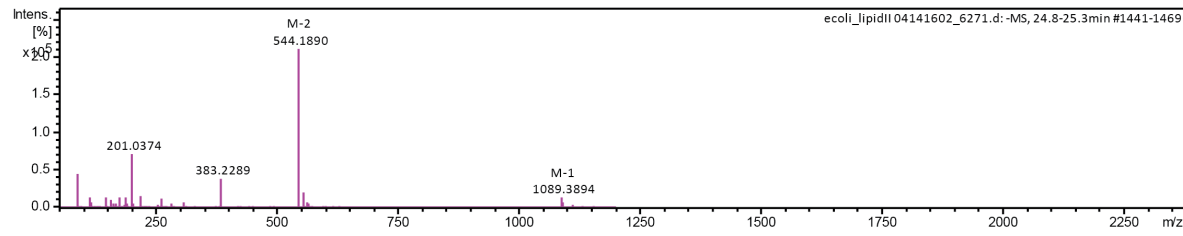

d) LC/MS/MS fragmentation pattern for *B. subtilis* and *E. coli* samples

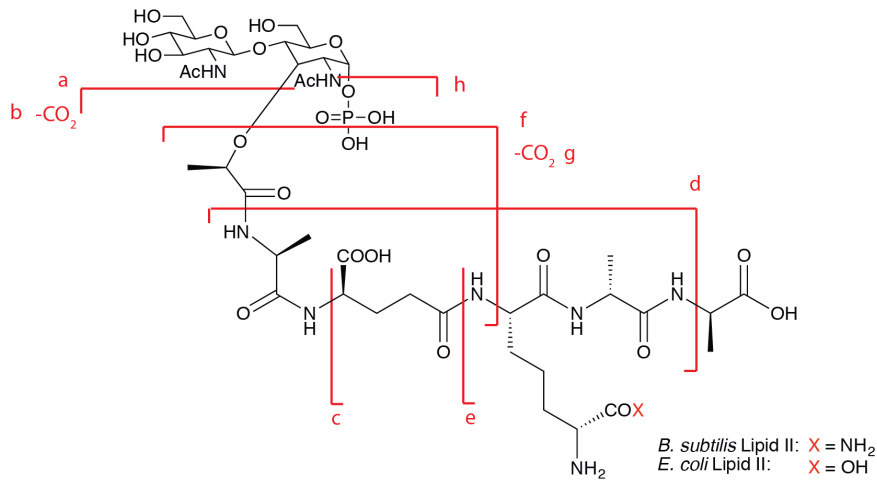

e) Comparison of LC/MS/MS from *B. subtilis* and *E. coli* samples

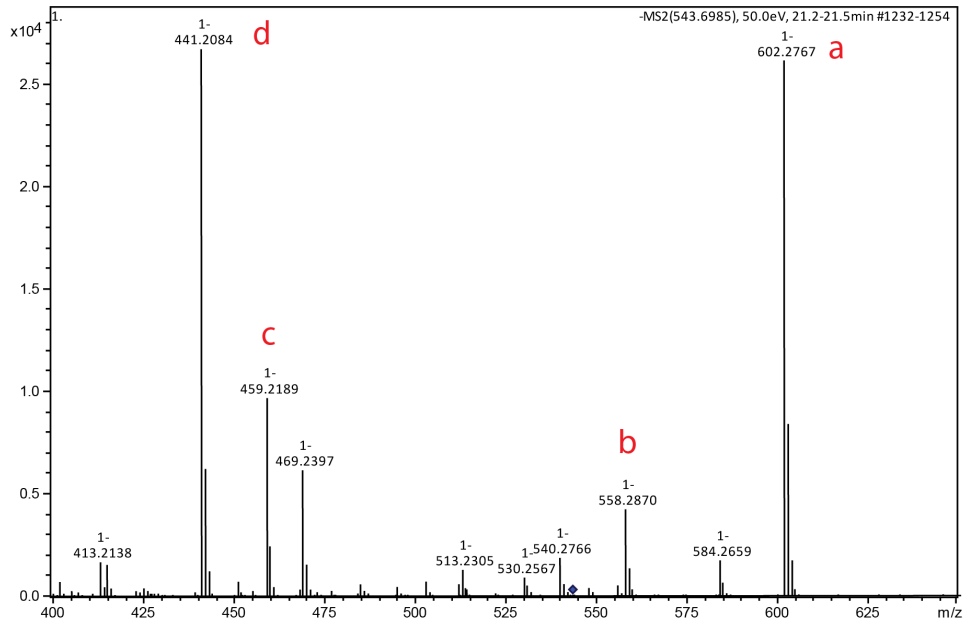

*B. subtilis* sample

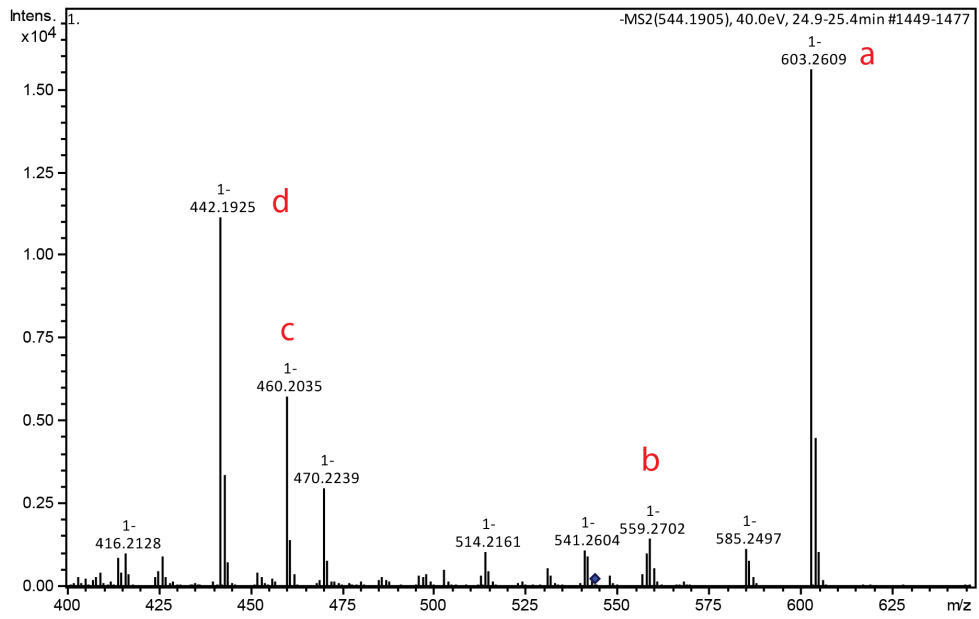

*E. coli* sample

e) Comparison of LC/MS/MS from *B. subtilis* and *E. coli* samples (continued)

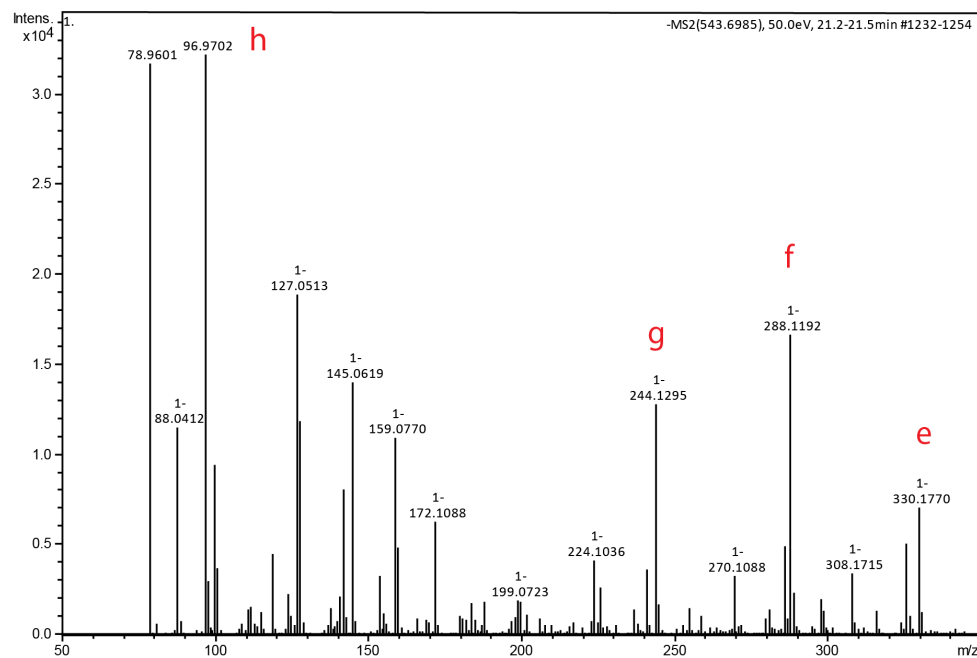

*B. subtilis* sample

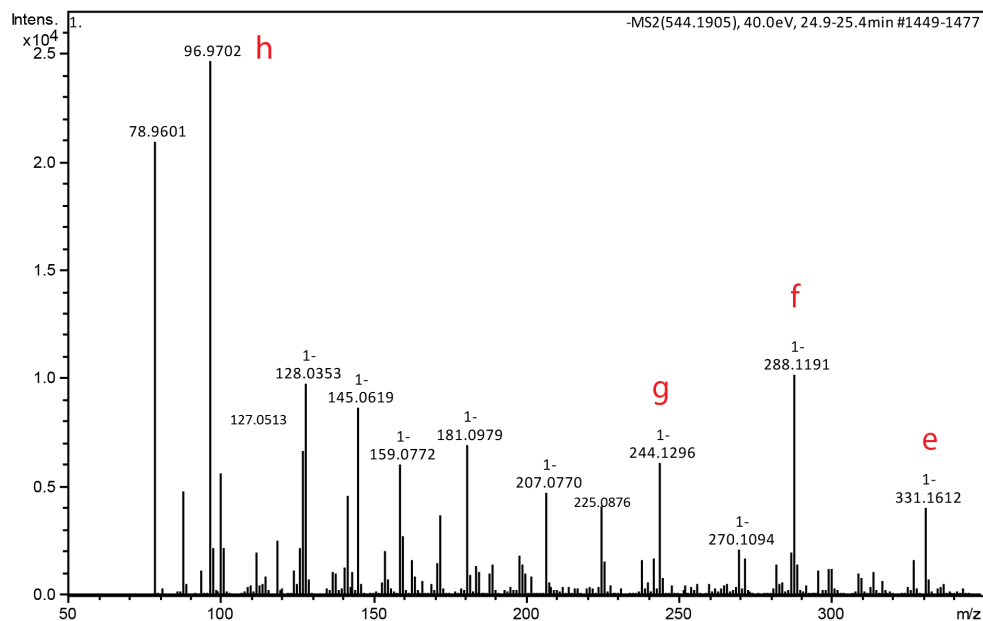

*E. coli* sample

**Supplementary Figure 3. LC/MS and MS/MS analyses confirm the identity of isolated Lipid II from bacteria.** *S. aureus* Lipid II contains an isoglutamine at the second position on the stem peptide and a pentaglycine branch (a-b); Fragmentation patterns reveal that *B. subtilis* Lipid II contains an amidated m-DAP residue at the third position of the stem peptide while *E. coli* Lipid II lacks the amidation on m-DAP (c-e).

a)

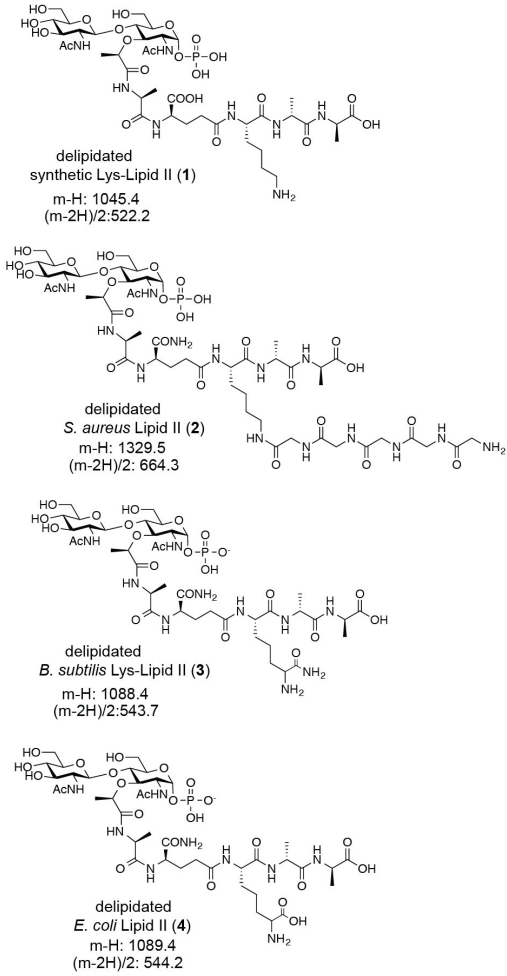

b)

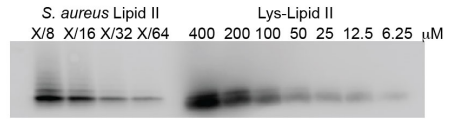

| BDL- <i>S. aureus</i> Lipid II  |           | BDL-Lys-Lipid II     |           |
|---------------------------------|-----------|----------------------|-----------|
| conc./ $\mu\text{M}$            | intensity | conc./ $\mu\text{M}$ | intensity |
| X/4                             | 15407.7   | 400                  | 28760.6   |
| X/8                             | 9845.0    | 200                  | 19705.6   |
| X/16                            | 4413.4    | 100                  | 10625.4   |
| X/32                            | 2582.7    | 50                   | 5365.6    |
| estimated X: 1210 $\mu\text{M}$ |           | 25                   | 3897.7    |
|                                 |           | 12.5                 | 2574.5    |
|                                 |           | 6.5                  | 1311.7    |

Estimation of total *S. aureus* Lipid II:  
1210  $\mu\text{M}$  x 2000  $\mu\text{L}$  x 2000 g/mol =  
4.8 mg per 6 L culture  
(~800  $\mu\text{g}$  *S. aureus* Lipid II per 1 L culture)

c)

|   | integrated areas of (m-H) & (m-2H)/2 |          |
|---|--------------------------------------|----------|
|   | 1                                    | 2        |
| A | 374458                               | 519397.7 |
| B | 185928.1                             | 534487.4 |
| C | 107485.8                             | 525003.7 |
| D | -                                    | 494418.8 |

estimated X: 540  $\mu\text{M}$

Estimated concentration = 540  $\mu\text{M}$

Estimation of total *S. aureus* Lipid II:  
540  $\mu\text{M}$  x 2000  $\mu\text{L}$  x 2000 g/mol =  
2 mg per 6 L culture  
(~333  $\mu\text{g}$  *S. aureus* Lipid II / 1 L culture)

d)

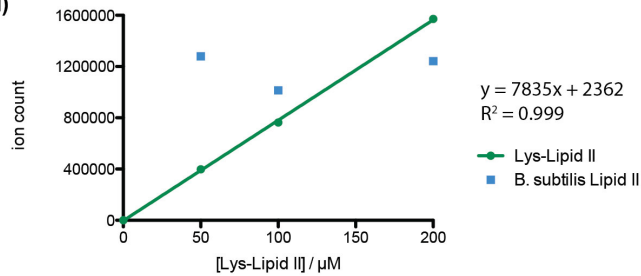

|   | integrated areas of (m-H) & (m-2H)/2 |                      |
|---|--------------------------------------|----------------------|
|   | 1                                    | 4                    |
| A | $6.6190 \times 10^8$                 | $3.9769 \times 10^8$ |
| B | $3.3630 \times 10^8$                 | $4.1599 \times 10^8$ |
| C | $1.7727 \times 10^8$                 | $4.2477 \times 10^8$ |

Estimated concentration = 150  $\mu\text{M}$

Sample dilution = 1x  
Estimation of total *B. subtilis* Lipid II:  
150  $\mu\text{M}$  x 100  $\mu\text{L}$  x 1918 g/mol =  
29  $\mu\text{g}$  per 1.5 L culture  
(20  $\mu\text{g}$  *B. subtilis* lipid II / 1 L culture)

e)

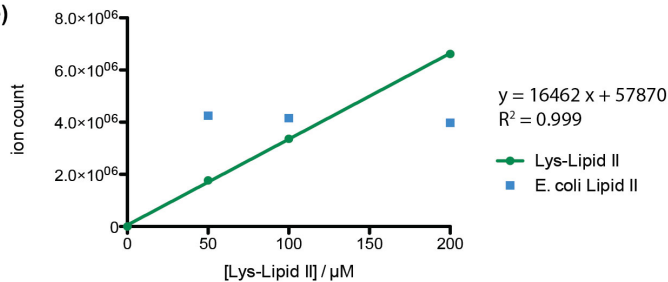

|   | integrated areas of (m-H) & (m-2H)/2 |                      |
|---|--------------------------------------|----------------------|
|   | 1                                    | 3                    |
| A | $1.5713 \times 10^6$                 | $1.2421 \times 10^6$ |
| B | $7.6324 \times 10^5$                 | $1.0137 \times 10^6$ |
| C | $3.9813 \times 10^5$                 | $1.2798 \times 10^6$ |

Estimated concentration = 247  $\mu\text{M}$

Sample dilution = 3.1x  
Initial concentration = 760  $\mu\text{M}$   
Estimation of total *E. coli* Lipid II:  
760  $\mu\text{M}$  x 100  $\mu\text{L}$  x 1919 g/mol =  
145  $\mu\text{g}$  per 1.5 L culture  
(97  $\mu\text{g}$  *E. coli* lipid II / 1 L culture)



**Supplementary Figure 4. Sufficient quantities of Lipid II can be isolated from bacteria.** *S. aureus* Lipid II was quantified by two orthogonal methods: western blot analysis of biotinylated Lipid II (b) and LC/MS analysis of delipidated Lipid II (c). The estimated yields by both methods agree. LC/MS analysis of delipidated Lipid II was used to quantify *B. subtilis* and *E. coli* Lipid II (d-e). Structures of delipidated Lipid II species are shown (a).

a)

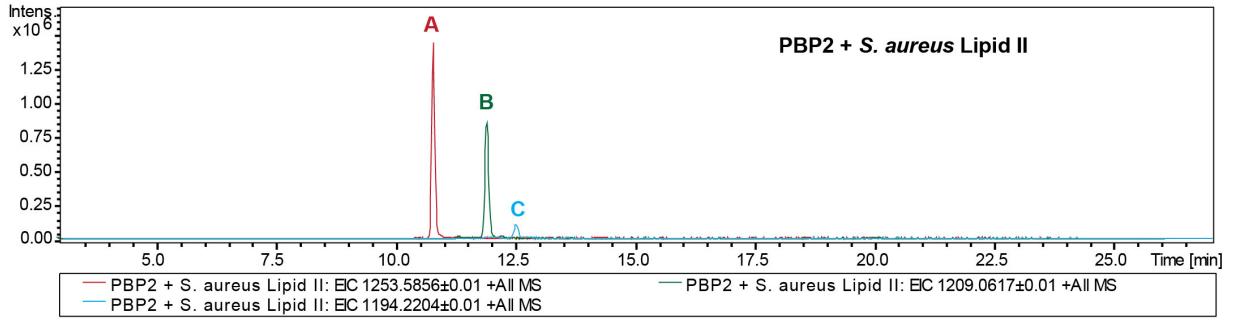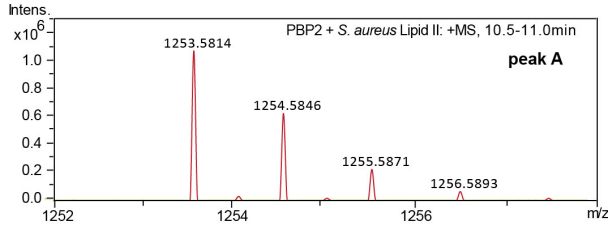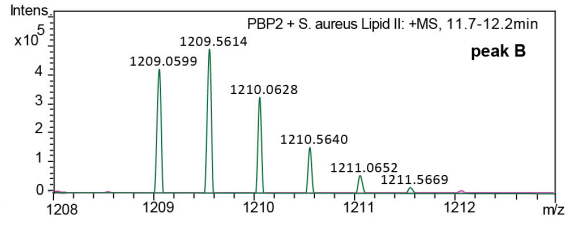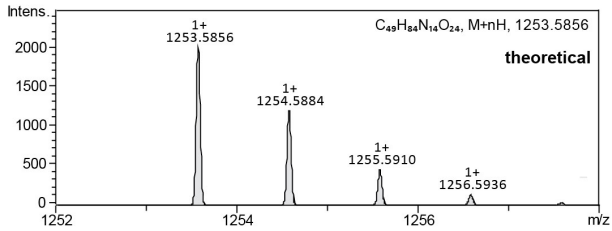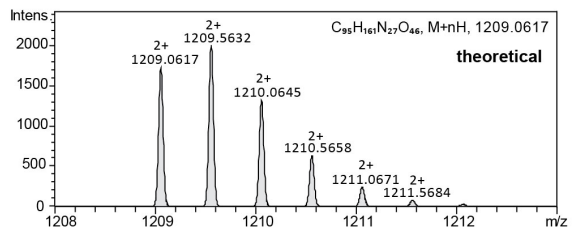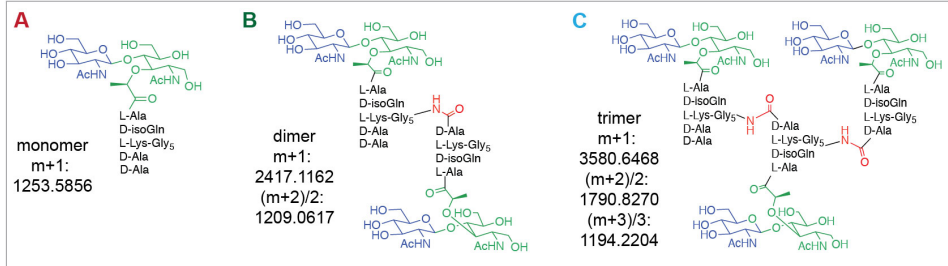

b)

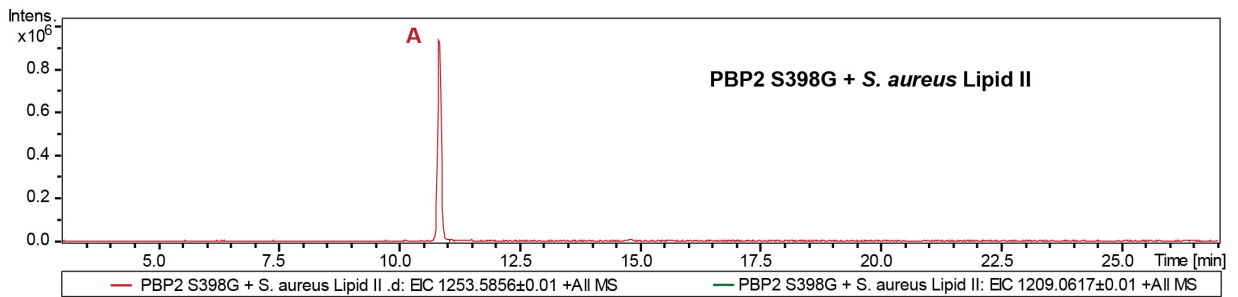

c)

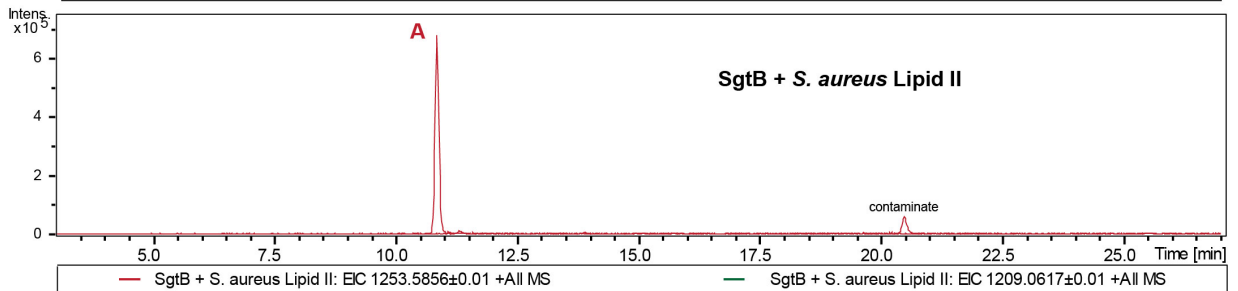

**Supplementary Figure 5. Reconstitution of crosslinked peptidoglycan by *S. aureus* PBP2 using native Lipid II.** (a) Extracted ion chromatogram (EIC) of muropeptide products. Peak A is the monomeric muropeptide, peak B is the crosslinked dimer, and peak C is the crosslinked trimer. High-resolution mass spectra of peak A and B are close to the theoretical mass spectra. The following ions were extracted: A: 1253.5856 (M+1), B: 1209.0617 ((M+2)/2), C: 1194.2204 ((M+3)/3). (b-c) Reaction with *S. aureus* PBP2<sup>S398G</sup> (TP inactive mutant) or SgtB, a monofunctional PGT does not yield crosslinked muropeptides.

a)

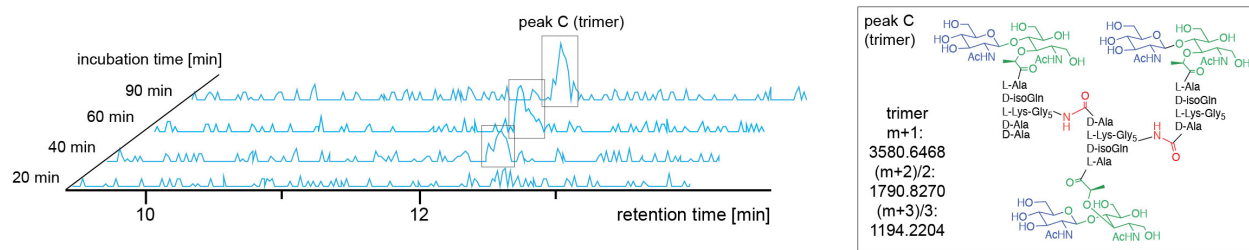

b)

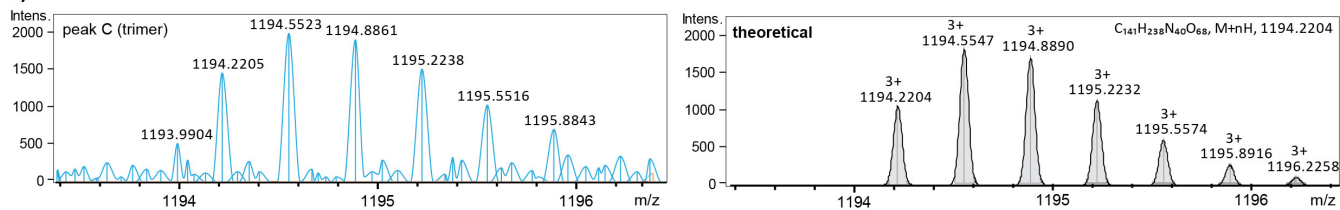

**Supplementary Figure 6. The amount of the crosslinked trimer mucopeptide increases as PBP2 reaction proceeds.** (a) The intensity of peak C (trimer mucopeptide) increases as PBP2 reaction time increases. The following ion was extracted: C: 1194.2204 ((M+3)/3). (b) The high-resolution mass spectrum of peak C is close to the theoretical mass spectrum.

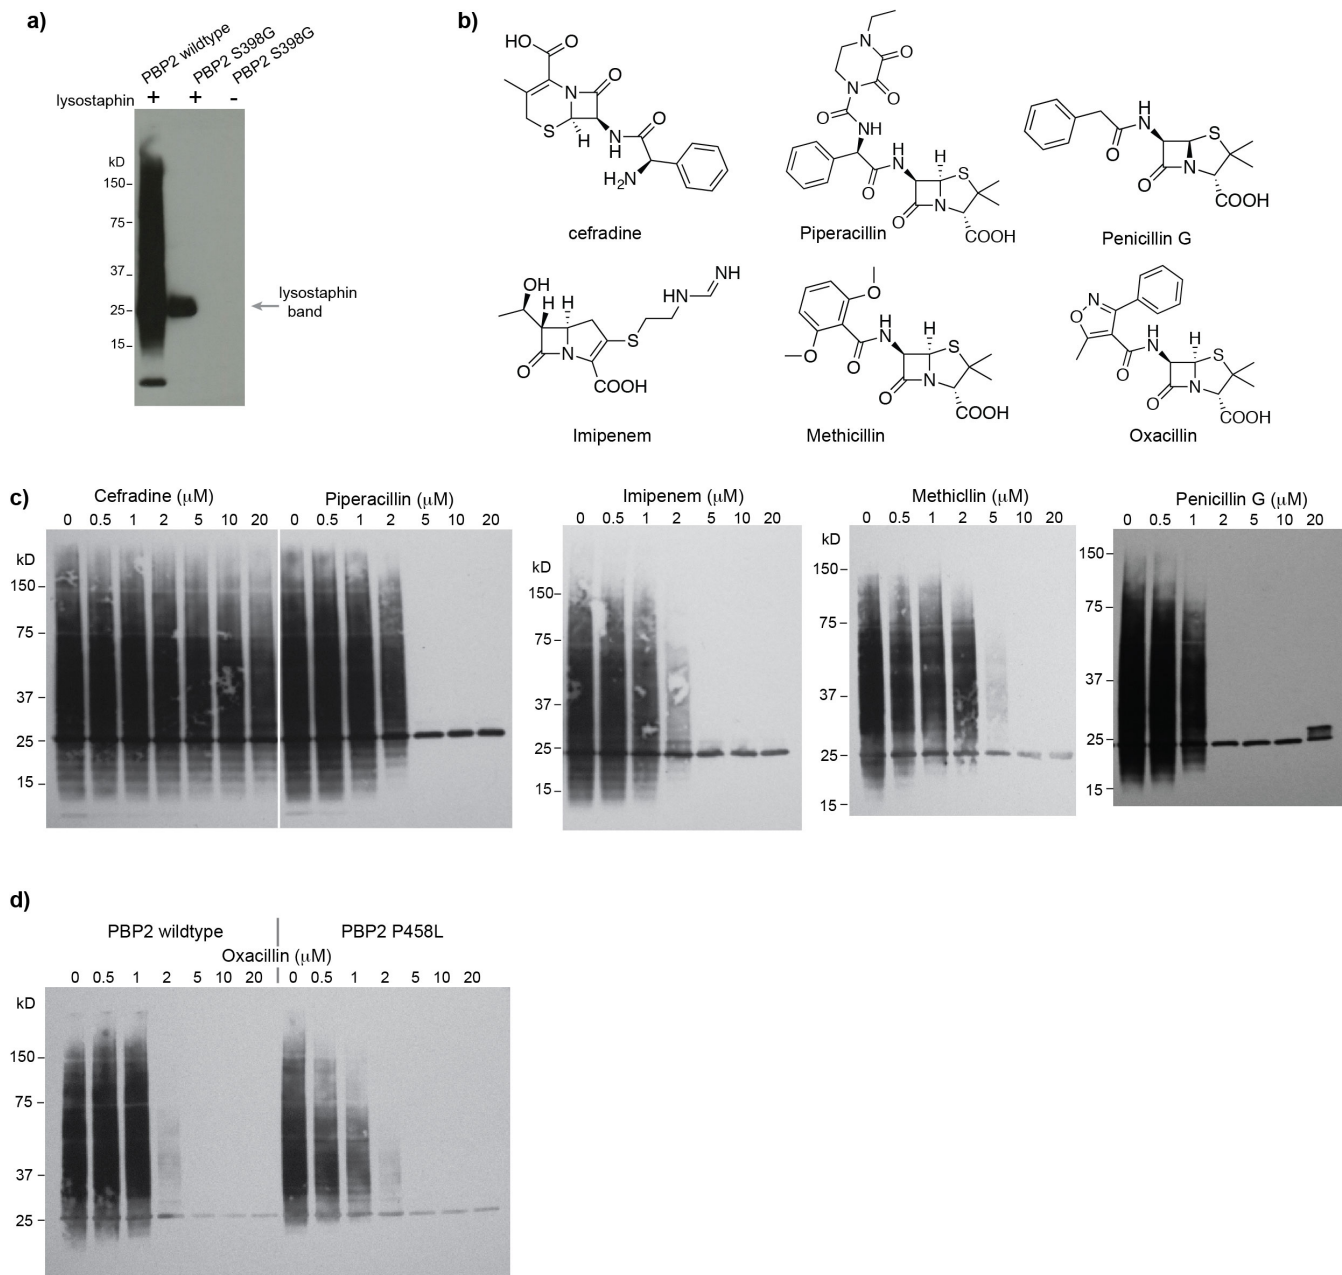

**Supplementary Figure 7. A direct transpeptidase activity assay enables characterization of inhibitory potencies of different beta-lactams.** (a) Western blot of crosslinked peptidoglycan produced by PBP2 with (left) requires active transpeptidase activity (middle-right). Product detection was enabled by BDL incorporation during PBP2 reaction. (b) Structures of beta-lactams examined in c-d. (c) Cefradine does not inhibit PBP2 activity up to the highest concentration tested in the experiment; whereas the other beta-lactams show potent inhibition. (d) The ceftizoxime-resistant mutant protein, PBP2<sup>P458L</sup>, shows no notable resistance to oxacillin compared to wild-type PBP2. For all experiments, 1  $\mu$ M of enzyme was used.

*S. aureus* sample

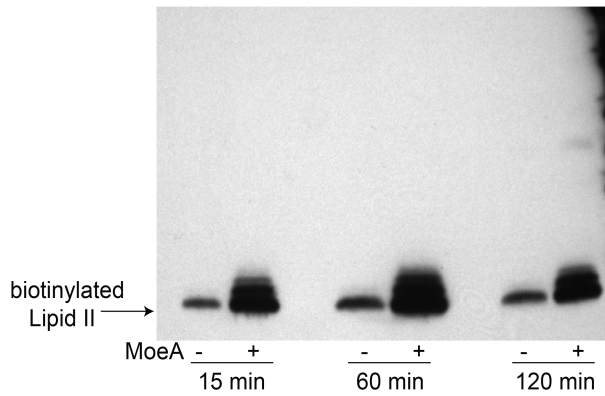

**Supplementary Figure 8. A full gel of *S. aureus* Lipid II accumulation.** Western blot of Lipid II isolated from *S. aureus* treated with and without moenomycin at various time points. The 15-min time points are cropped to use in Figure 2a.

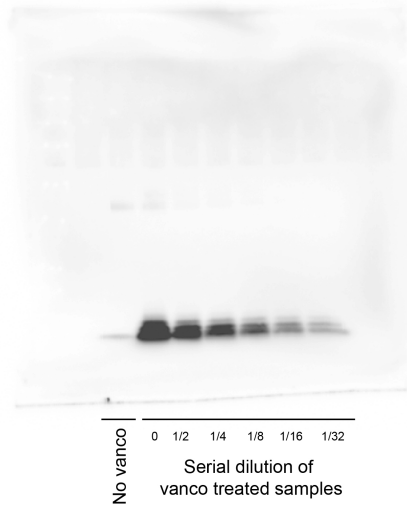

**Supplementary Figure 9. A full gel of *B. subtilis* Lipid II accumulation.** Western blot of Lipid II isolated from *B. subtilis* treated with and without vancomycin at various time points. The first two lanes were cropped to use in Figure 2a.

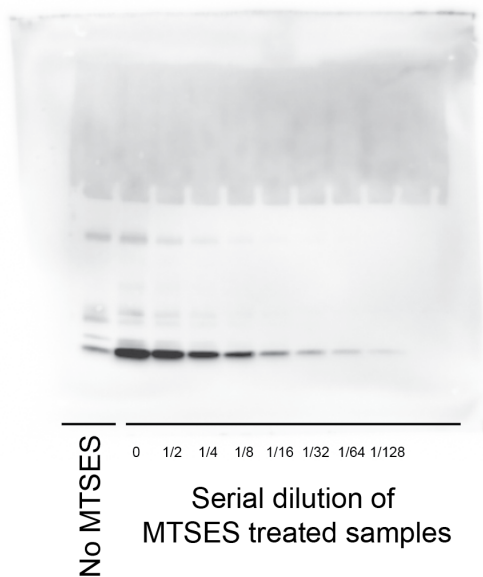

**Supplementary Figure 10. A full gel of *E. coli* Lipid II accumulation.** Western blot of Lipid II isolated from *E. coli* (MurJ<sup>A29C</sup>) treated with and without MTSES at various time points. The first two lanes are cropped to use in Figure 2b.

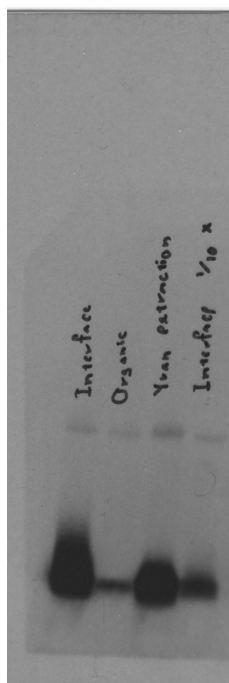

**Supplementary Figure 11. A full gel of Lipid II comparison between the interface and the organic layer.** The first two lanes are cropped to use in Figure 3b.

| Primer Name   | Sequence (5'-3')                                    |
|---------------|-----------------------------------------------------|
| F'pET42a_PBP2 | AGGAGATATACATATGAAAGCACCTGCTTTTACCGAAGC             |
| R'pET42a_PBP2 | GTGGTGCTCGAGAGATTGTTGAGATCTAGTATTGTTATTTGATTGTGCAGT |
| F'pET42a      | ATCTCAACAATCTCTCGAGCACCACCACC                       |
| R'pET42a      | AGGTGCTTTCATATGTATATCTCCTTCTTAAAGTTAAACAAAATTATTC   |
| F'PBP2_S398G  | CAACAGATCCTCACCTACTGGTGGATCTTTAAACCTTTCTTAGCGTAT    |
| R'PBP2_S398G  | ATACGCTAAGAAAGGTTTTAAAGATCCACCAGTAGGGTGAGGATCTGTTG  |
| F'PBP2_P458L  | GACAAAGTTTCAATATCCTAGCTTTAAAAG                      |
| R'PBP2_P458L  | CTTTTAAAGCTAGGATATTGAACTTTGTC                       |

**Supplementary Table 1. Primers used in this study.**

**Reference:**

- 1 Qiao, Y. *et al.* Detection of lipid-linked peptidoglycan precursors by exploiting an unexpected transpeptidase reaction. *J. Am. Chem. Soc.* **136**, 14678-14681, (2014).
